1 **The immunogenicity and reactogenicity of four COVID-19 booster vaccinations against**  
2 **SARS-CoV-2 variants of concerns (Delta, Beta, and Omicron) following CoronaVac or**  
3 **ChAdOx1 nCoV-19 primary series**

4  
5 Nasikarn Angkasekwinai<sup>1</sup>, Suvimol Niyomnaitham<sup>2,3</sup>, Jaturong Sewatanon<sup>4</sup>, Supaporn  
6 Phumiamorn<sup>5</sup>, Kasama Sukapirom<sup>6,7</sup>, Sansnee Senawong<sup>8</sup>, Zheng Quan Toh<sup>9,10</sup>, Pinklow  
7 Umrod<sup>8</sup>, Thitiporn Somporn<sup>5</sup>, Supaporn Chumpol<sup>5</sup>, Kanokphon Ritthitham<sup>5</sup>, Yuparat  
8 Jantraphakorn<sup>11</sup>, Kanjana Srisutthisamphan<sup>11</sup>, and Kulkanya Chokephaibulkit<sup>3,12,\*</sup>

9  
10 <sup>1</sup>Department of Medicine, Faculty of Medicine Siriraj Hospital, Mahidol University, Thailand

11 <sup>2</sup>Department of Pharmacology, Faculty of Medicine Siriraj Hospital, Mahidol University,  
12 Thailand

13 <sup>3</sup>Siriraj Institute of Clinical Research (SICRES), Mahidol University, Thailand

14 <sup>4</sup>Department of Microbiology, Faculty of Medicine Siriraj Hospital, Mahidol University,  
15 Thailand

16 <sup>5</sup>Department of Medical Sciences, Ministry of Public Health, Thailand

17 <sup>6</sup>Biomedical Research Incubator Unit, Department of Research, Faculty of Medicine Siriraj  
18 Hospital, Mahidol University, Thailand

19 <sup>7</sup>Siriraj Center of Research Excellence in Microparticle and Exosome in Disease, Thailand

20 <sup>8</sup>Department of Immunology, Faculty of Medicine Siriraj Hospital, Mahidol University, Thailand

21 <sup>9</sup>Murdoch Children's Research Institute, Parkville, Victoria, Australia

22 <sup>10</sup>Department of Pediatrics, The University of Melbourne, Parkville, Victoria, Australia

23 <sup>11</sup>Virology and Cell Technology Research Team, National Center for Genetic Engineering and  
24 Biotechnology (BIOTEC), National Science and Technology Development Agency (NSTDA),  
25 Pathumthani 12120, Thailand.

26 <sup>12</sup>Department of Pediatrics, Faculty of Medicine Siriraj Hospital, Mahidol University, Thailand

27

28 **\*Corresponding author:**

29 Kulkanya Chokephaibulkit, MD

30 Professor of Pediatrics,

31 Department of Pediatrics, Faculty of Medicine Siriraj Hospital, Mahidol University

32 Siriraj Institute of Clinical Research (SICRES)

33 2 Wanglang Road, Bangkoknoi, Bangkok 10700, Thailand

34 Tel: (+66) 2-4141899; Fax: (+66) 2-4128243

35 E-mail: [kulkanya.cho@mahidol.ac.th](mailto:kulkanya.cho@mahidol.ac.th)

36

37 Nasikarn Angkasekwini and Suvimol Niyomnaitham equally contributed to the research work.

38

39 Abstract word count: 197

40 Manuscript Text word count: 3354

41

42

43

44

45

46 **Abstract**

47 The CoronaVac (Sinovac Biotech) and ChAdOx1(Oxford-AstraZeneca) are two widely used  
48 COVID-19 vaccines. We examined the immunogenicity of four COVID-19 booster vaccine:  
49 BBIBP-CorV (Sinopharm Biotech), ChAdOx1, 30µg-BNT162b2 and 15µg-BNT162b2 (Pfizer-  
50 BioNTech), in healthy adults who received a two-dose CoronaVac or ChAdOx1 8-12 weeks  
51 earlier. Among the 352 participants (179 CoronaVac and 173 ChAdOx1 participants), 285 (81%)  
52 were female, and median age was 39(IQR: 31-47) years. 98%(175/179) and 99%(172/173) of  
53 Coronavac and ChAdOx1 participants remained seropositive at baseline. Two weeks post-  
54 booster, both 30µg- and 15µg- BNT162b2 induced the highest anti-RBD IgG concentration  
55 (BAU/mL); Coronavac-prime: 30µg-BNT162b2, 5152.2(95%CI 4491.7-5909.8); 15µg-  
56 BNT162b2, 3981.1(3397.2-4665.4); ChAdOx1, 1358.0(1141.8-1615.1); BBIBP-CorV,  
57 154.6(92.11-259.47); ChAdOx1-prime: 30µg-BNT162b2, 2363.8(2005.6-2786.1); 15µg-  
58 BNT162b2, 1961.9(1624.6-2369.1); ChAdOx1, 246.4(199.6-304.2); BBIBP-CorV, 128.1(93.5-  
59 175.4). Similarly, both 30µg- and 15µg- BNT162b2 boosting induced the highest neutralizing  
60 antibodies (nAb) titres against all variants and highest T-cell response evaluated by interferon  
61 gamma released assays. While all BNT162b2 or heterologous ChAdOx1-boosted participants  
62 had nAb against Omicron, these were <50% for BBIBP-CorV and 75% for homologous  
63 ChAdOx1-boosted participants. There was significant decrease in nAb (>4-fold) 16-20 weeks  
64 post booster. Heterologous boosting with BNT162b2 following CoronaVac or ChAdOx1  
65 primary series is most immunogenic. A lower dose BNT162b2 may be considered as booster in  
66 settings with limited vaccine supply.

67

68 **Keywords:** Booster; COVID-19; CoronaVac; ChAdOx1; vaccine.

## 69 **Introduction**

70 Both CoronaVac (an inactivated whole-virion SARS-CoV-2 vaccine, Sinovac Life Science)  
71 and ChAdOx1 (a chimpanzee adenovirus-vectored vaccine expressing the SARS-CoV-2 spike  
72 protein, Oxford, AstraZeneca) are safe and effective vaccines against symptomatic COVID-19  
73 caused by the ancestral Wuhan strain, and to a lower extent against the Delta variant, and even  
74 lower efficacy against Omicron [1-7]. These two vaccines are widely used vaccines globally,  
75 particularly in low- and middle-income countries [8].

76 Breakthrough infections following COVID-19 vaccination, which are likely due to a  
77 combination of waning immunity and the emergence of SARS-CoV-2 variants, have led to the  
78 need for booster vaccination [9-13]. While the antibody threshold of protection has not been  
79 identified, higher antibody levels are likely to be associated with greater protection<sup>7</sup>. Cell  
80 mediated immune responses generated following vaccination also plays an important role in  
81 protection against SARS-CoV-2.

82 Several studies have demonstrated improved humoral responses with heterologous COVID-  
83 19 prime-boost vaccination, primarily on ChAdOx1 and mRNA vaccines [14-18]. However,  
84 other combinations of prime-boost COVID-19 vaccination involving inactivated COVID-19  
85 vaccines have not been evaluated. Furthermore, the persistence of immunity following a booster  
86 (3rd) dose of COVID-19 vaccine is unknown. A recent study of reduced dosage of mRNA-1273  
87 vaccine as a booster was found to be highly immunogenic, suggesting that a lower dosage  
88 vaccine may be equally immunogenic as a standard dosage, particularly for mRNA vaccines  
89 [19].

90 In this study, we examined the safety and immunogenicity of four booster vaccinations at 2  
91 weeks and up to 16-20 weeks in healthy adults who previously received a 2-dose primary series  
92 of CoronaVac or ChAdOx1 vaccine 8-12 weeks earlier.

93

## 94 **Results**

95 Among 352 participants enrolled (179 and 173 participants in CoronaVac- and  
96 ChAdOx1-prime group), 285 (81%) were female, and the median age was 39 (interquartile  
97 range, IQR: 31-47) years. The demographic of the study participants receiving different booster  
98 vaccine was shown in Table 1. The recruitment for BBIBP-CorV booster groups were stopped  
99 after 36 participants, 14 in CoronaVac-prime and 22 in ChAdOx1-prime, after the preliminary  
100 analysis found low anti-SARS-CoV-2 RBD IgG concentration.

101

## 102 **Adverse events (AEs)**

103 Among the CoronaVac-prime groups, the overall AEs was most frequent after boosting  
104 with ChAdOx1 (98%), followed by 30 $\mu$ g-BNT162b2 (92%), 15 $\mu$ g-BNT162b2 (80%), and  
105 BBIBP-CorV (70%); whereas in ChAdOx1-prime group, the overall AEs was most frequent  
106 after boosting with 30 $\mu$ g-BNT162b2 (98%), followed by 15 $\mu$ g-BNT162b2 (88%), ChAdOx1  
107 (72%), and BBIBP-CorV (61%) (Fig. 1, Supplementary Table 1). Systemic AEs were in the  
108 same trend as local AEs (Fig. 1 and Supplementary Table 1). All AEs were mild (grade 1) to  
109 moderate (grade 2) in severity and recovered within 2-3 days. No serious AEs was found in this  
110 study.

111

## 112 **Anti-SARS-CoV-2 RBD IgG responses**

113 At baseline (8-12 weeks post-primary series), 175/179 (97.8%) participants in  
114 CoronaVac-prime and 172/173 (99.4%) in ChAdOx1-prime remained seropositive. The anti-  
115 RBD IgG GMC at baseline were lower in the CoronaVac-prime groups than in the ChAdOx1-  
116 prime group (36.31 vs. 98.27 BAU/mL) (Fig. 2A-B). For the CoronaVac-prime groups, the anti-  
117 RBD IgG geometric mean concentrations (GMC) post-booster in the 30 $\mu$ g-BNT162b2 group  
118 (5152.2 BAU/mL, 95%CI 4491.7-5909.8) was significantly higher than other vaccine booster  
119 groups: 15 $\mu$ g-BNT162b2 (3981.1 BAU/mL, 95% CI 3397.2-4665.4), ChAdOx1 (1,358  
120 BAU/mL, 95%CI 1141.8, 1615.1), and BBIBP-CorV (154 BAU/mL, 95%CI 92.11, 259.47)  
121 (Fig. 2A and Supplementary Table 2). The geometric mean ratio (GMR) between post-boost and  
122 post-primary series of CoronaVac for BBIBP-CorV, ChAdOx1, 30 $\mu$ g-BNT162b2 and 15 $\mu$ g-  
123 BNT162b2 were 0.94, 8.26, 31.34, and 24.22, respectively (Supplementary Table 2).

124 For the ChAdOx1-prime group, the anti-RBD IgG GMC post-booster was significantly  
125 higher in participants who received 30 $\mu$ g-BNT162b2 (2363.8, 95%CI 2005.6-2786.1) or 15 $\mu$ g-  
126 BNT162b2 (1961.9 BAU/mL, 95% CI 1624.6-2369.1) compared to those who received  
127 ChAdOx1 (246.4 BAU/mL, 95%CI 199.6-304.2); and BBIBP-CorV (128.1 BAU/mL, 95%CI  
128 93.5-175.4) (Fig. 2B). The GMR between post-boost and post-primary series of ChAdOx1 were  
129 0.46, 0.88, 8.49, and 7.04 for BBIBP-CorV, ChAdOx1, 30 $\mu$ g-BNT162b2 and 15 $\mu$ g-BNT162b2,  
130 respectively (Supplementary Table 2). The post-boost GMC levels in ChAdOx1-prime were  
131 generally lower than that in the CoronaVac-prime group for all booster vaccines (Fig. 2C).

132

### 133 **Neutralizing antibody responses against the SARS-CoV-2 variants**

134 At 2 weeks post booster dose, almost all participants had (50% plaque reduction  
135 neutralization titre) PRNT<sub>50</sub> against Delta and Beta; 1/30 (3%) participant in the ChAdOx1-

136 ChAdOx1 group was negative against Delta and nine participants among the CoronaVac-  
137 BBIBP-CorV (2/14, 14%), ChAdOx1-BBIBP-CorV (3/22, 14%) and ChAdOx1-ChAdOx1 (4/30,  
138 13%) were negative against Beta. For both the CoronaVac-prime and ChAdOx1-prime groups,  
139 the PRNT<sub>50</sub> GMT against the Delta (Fig. 3A) and Beta (Fig. 3B) variant were significantly  
140 higher among those who received a booster dose of BNT162b2 (30µg or 15µg) compared to  
141 those who received ChAdOx1 or BBIBP-CorV. There was no statistical difference in PRNT<sub>50</sub>  
142 between boosting with 30µg and 15µg- BNT162b2 regardless of the primary series vaccine and  
143 the type of variants. However, the PRNT<sub>50</sub> against the Beta variant was in general around 1.5-  
144 fold lower than the Delta variants for both CoronaVac-prime and ChAdOx1-prime groups (Fig.  
145 3C). The GMRs of the PRNT<sub>50</sub> between post-boost and post-primary series were highest among  
146 the participants who received BNT162b2 boosting vaccination in both CoronaVac-prime and  
147 ChAdOx1-prime groups (Table 2). The SARS-CoV-2 RBD IgG levels and the PRNT<sub>50</sub> against  
148 Delta variant (Supplementary Fig. S1A and B) or Beta variant (Supplementary Fig. S1C and D)  
149 were strongly correlated ( $r = 0.49-0.89$ ).

150 In order to compare the neutralising titers between Delta and Omicron, we performed the  
151 pseudovirion neutralization test (PVNT) assay on both variants. At 2 weeks post booster dose,  
152 almost all participants had 50% pseudovirus neutralization antibody titres (PRNT<sub>50</sub>) against  
153 Delta, except for 4 participants in the CoronaVac-BBIBP-CorV (2/14, 14%) and ChAdOx1-  
154 BBIBP-CorV (2/20, 10%). In contrast, PRNT<sub>50</sub> against Omicron was only present in  $\leq 50\%$  in  
155 CoronaVac-BBIBP-CorV and ChAdOx1-BBIBP-CorV groups, and 75% (15/20) in the  
156 ChAdOx1- ChAdOx1. Among the CoronaVac-prime groups, 15µg and 30µg-BNT162b2 booster  
157 induced similar PVNT<sub>50</sub> against Omicron (Fig 4A), whereas in the ChAdOx1-prime groups, the  
158 group that received 15µg-BNT162b2 induced significantly lower PVNT<sub>50</sub> against Omicron

159 compared to the 30 $\mu$ g-BNT162b2 group (Fig. 4B). Notably, both CoronaVac- and ChAdOx1-  
160 prime groups that received ChAdOx1 booster had significantly lower PVNT<sub>50</sub> against Delta and  
161 Omicron variants than the groups that received 15 $\mu$ g- or 30  $\mu$ g BNT162b2 (Fig. 4A and 4B).  
162 Between the CoronaVac- and ChAdOx1-prime groups that received ChAdOx1 booster,  
163 CoronaVac prime-ChAdOx1 boost group had significantly higher PVNT<sub>50</sub> against Delta and  
164 Omicron variants than the ChAdOx1 prime-ChAdOx1 boost group (Fig. 4A-B and Table 2). The  
165 PVNT<sub>50</sub> GMT against Omicron was 2- to 37-folds lower than that against Delta (Fig. 4C and  
166 Table 2).

167 The groups that received BBIPB-CorV as booster or ChAdOx1 as priming and booster  
168 (3-dose ChAdOx1) were not followed up for the 16-20 weeks as they have received additional  
169 booster vaccination outside of this study after revealing the low antibody results. For the rest of  
170 the groups, there was a significant decline (at least 4-fold) in PVNT<sub>50</sub> against Delta and Omicron  
171 at 16-20 weeks after boosting in both the CoronaVac-prime and ChAdOx1-prime groups (Fig.  
172 4D-E and Table 2). However, 100% and >90% of each group remained seropositive against  
173 Delta and Omicron. No significant difference in PVNT<sub>50</sub> against Delta and Omicron was  
174 observed between the CoronaVac-prime and ChAdOx1-prime groups at this timepoint (Table 2).  
175 However, a more significant drop in PVNT<sub>50</sub> against Omicron (4.5 to 122 folds) was observed  
176 compared to the Delta variant (4 to 9-fold) (Fig 4D-E, Table 2).

177

### 178 **QuantiFERON SARS-CoV-2 interferon gamma release assay (IGRA)**

179 Cellular immunity was measured at baseline using the QuantiFERON SARS-CoV-2  
180 interferon gamma release assay (IGRA). Participants with a negative IGRA response at baseline  
181 were tested again at two weeks post-booster. At baseline, a higher proportion of 35.8% (62/173)



182 of participants in ChAdOx1-prime group and 25% (45/179) of CoronaVac-prime group had  
183 positive IGRA ( $P=0.029$ ). Among those with negative IGRA at baseline, IGRA conversion was  
184 the highest after a booster dose of 30 $\mu$ g-BNT162b2, followed by 15 $\mu$ g-BNT162b2, ChAdOx1,  
185 and BBIBP-CorV (Supplementary Table 2). None of the study participants who were IGRA-  
186 negative at baseline in the ChAdOx1-prime group had a positive IGRA response following  
187 boosting with BBIBP-CorV or ChAdOx1 (Supplementary Table 2 and Supplementary Fig. S2).

188

## 189 **Discussion**

190 In this study, BBIBP-CorV, ChAdOx1, BNT162b2 (standard and reduced dosage) given  
191 as booster dose to individuals who previously received either CoronaVac or ChAdOx1 primary  
192 series were found to be safe and well tolerated. BNT162b2 given as a booster induced the  
193 highest humoral and cellular immune responses compared to BBIBP-CorV or ChAdOx1.  
194 Furthermore, both 15 $\mu$ g and 30 $\mu$ g-BNT162b2 induced similar humoral responses against the  
195 SARS-CoV-2 all variants tested for both CoronaVac- and ChAdOx1- prime groups, except for  
196 the neutralising antibody titers against the Omicron variant in the ChAdOx1-prime group.  
197 Notably, higher humoral response was observed in the CoronaVac-prime group following the  
198 booster dose compared to the ChAdOx1-prime group while having the lower circulating  
199 antibodies at baseline. Despite a rapid decline in neutralising antibodies against Delta and  
200 Omicron 16-20 weeks following heterologous ChAdOx1 or BNT162b2 booster, a high  
201 proportion of individuals still have antibodies against Delta and Omicron.

202 Heterologous boosting vaccination in our study were generally well tolerated, and the  
203 AEs rates observed in this study were in line with those reported in COVID-19 vaccine primary  
204 series and booster studies [19,20]. Heterologous boosting regimen were also found to be more

205 immunogenic than homologous ChAdOx1 boosting regimen or homologous inactivated vaccines  
206 regimen (CoronaVac prime-BBIBP-CorV boost) in our study, which was consistent with recent  
207 studies [21-25]. However, heterologous boosting with BBIBP-CorV vaccine was poorly  
208 immunogenic, which was in line with previous studies, including a study that revealed poor  
209 immunogenicity of heterologous ChAdOx1 prime-VLA2001 (inactivated vaccine by Valvena)  
210 boost [24]. Our findings suggest that inactivated whole virus vaccine as a booster vaccine may  
211 not be effective at generating high levels of neutralising antibodies.

212         The SARS-CoV-2 Omicron variant, recently identified in November 2021 has been  
213 reported to evade immunity induced from past infection or two vaccine doses [26-28]. Our  
214 results suggest that a third dose of BNT162b2 can overcome this immune evasion through the  
215 induction of neutralising antibodies. A recent study also reported high antibodies against  
216 Omicron following a third dose of mRNA vaccines (mRNA-1273 or BNT162b2) [29].  
217 Heterologous boost with ChAdOx1 was immunogenic in CoronaVac-prime participants but was  
218 poorly immunogenic in ChAdOx1-prime recipients. Taken together, these data support the use of  
219 BNT162b2 as a booster regardless of the primary series against the Delta and Omicron variants  
220 that are widely circulating globally. Consequently, ChAdOx1 may also be use as a booster for  
221 CoronaVac-prime participants.

222         The persistence of immunity following COVID-19 booster is unknown. Our findings  
223 suggest possible protection against Delta and Omicron infection for at least 16-20 weeks despite  
224 rapid waning antibody levels. It is important to note that the antibody threshold of protection  
225 against infection and severe disease has not been identified, and immune memory cells which are  
226 thought to be important for long-term protection was not measured in our study. Furthermore, a  
227 recent study reported breakthrough infections two months after receiving a mRNA booster dose

228 (received mRNA primary series) [30]. Larger studies with longer duration are needed to confirm  
229 our findings and also determine the persistence of immunity against SARS-CoV-2 infection and  
230 severe disease. A fourth booster dose study has been studied in high-risk groups [31] and is  
231 currently under investigation in Israel [32].

232 Virus-specific memory T cells are important for protection against SARS-CoV-2,  
233 particularly against severe disease. Only a third of ChAdOx1-prime and a quarter of CoronaVac-  
234 prime participants in our study remained positive for IGRA as a marker for T cell response at  
235 baseline; i.e. 8-12 weeks post primary series. Previous studies evaluating 2-dose ChAdOx1  
236 primary series have reported the generation of robust T cell response following the first dose,  
237 with no significant increase in T cell responses following the second dose [33,34], and following  
238 a homologous ChAdOx1 booster [21]. On the other hand, the study of 2-dose CoronaVac  
239 primary series revealed poor inducer of T-cell response [35]. The discrepancy in T cell responses  
240 after primary series from our study could be due to waning immunity, population differences and  
241 the different assays used to measure IFN- $\gamma$  response (Quantiferon vs. IFN- $\gamma$  ELISPOT). We  
242 found BBIBP-CorV boosting poorly induced IGRA response; however, it is important to note  
243 that inactivated vaccine (i.e. BBIBP-CorV) may have other antigens (i.e., M or N proteins) that  
244 induce T cell responses [36], whereas in our study, we only examined T cell responses to S  
245 protein, and thus may have underestimated the cellular responses. The low T cell boosting  
246 responses following homologous boosting regimen of ChAdOx1 is in line with the low  
247 neutralizing antibody boosting responses observed in this study. This could be explained by the  
248 anti-vector interference, and possibly due to a short interval (8-12 weeks) between the third and  
249 second dose.

250 Our finding that half-dose BNT162b2 was equally immunogenic as the standard dosage,  
251 but with less reactogenicity, suggesting that less amount of antigen may be sufficient for  
252 boosting immune responses against SARS-CoV-2. This finding is in concordance with previous  
253 study on mRNA1273 vaccine where half dose of the mRNA1273 (50 µg) was able to induce  
254 significantly higher neutralizing antibodies than the level induced after primary series against the  
255 SARS-CoV-2 variants of concerns [19]. A lower mRNA vaccine dose may be considered for  
256 COVID-19 booster vaccination, given that the limited vaccine supply globally.

257 There are some limitations in this study. First, our study was conducted in a non-  
258 randomized open label manner which was due to the availability of each vaccine at a different  
259 timing may lead to selection bias. Second, our sample size is small, particularly those who  
260 received BBIBP-CorV as booster; therefore, the data need to interpret with caution. Third, the  
261 participants in this study were healthy adults, and may not be generalized to other populations  
262 such as immunocompromised individuals. Lastly, how our findings translate to disease  
263 protection warrant further investigation.

264  
265 In conclusion, our study found that a booster dose of BNT162b2 given to individuals  
266 previously vaccinated with CoronaVac or ChAdOx1 is the most immunogenic and induced high  
267 cross protective antibodies against Delta, Beta, and Omicron variants, and T-cell response.  
268 BBIBP-CorV and homologous ChAdOx1 are not effective booster vaccines. The rapid decline of  
269 antibodies after 16-20 weeks of receiving the booster warrants further investigation into the  
270 efficacy and persistence of immunity following the booster dose. Our study findings have  
271 important implications on the choice of booster dose for countries that have introduced  
272 CoronaVac or ChAdOx1 as primary series to date. Our study also suggests that reduced dosage

273 of BNT162b2 may be used as a booster dose that may be highly relevant for countries with  
274 limited vaccine supply particularly if CoronaVac was used in the primary series.

275

## 276 **Methods**

### 277 *Study design and participants*

278 This single-center prospective, non-randomized, open-labeled cohort study enrolled 352  
279 healthy adults, aged 18 years or older at Siriraj Hospital, a university-based referral center in  
280 Bangkok, Thailand, from July to September 2021. The eligible participants were those who have  
281 received either 2 doses of CoronaVac (4 weeks apart) (CoronaVac-prime) or ChAdOx1 (8-10  
282 weeks apart) (ChAdOx1-prime) primary series vaccination 8-12 weeks prior to recruitment. The  
283 exclusion criteria were history of SARS-CoV-2 infection; prior received prophylactic or  
284 investigational treatment against COVID-19 within 90 days; had an unstable underlying disease;  
285 history of vaccine anaphylaxis; being pregnant; immunocompromised or currently receiving  
286 immunosuppressive agents. Written informed consent was obtained from all study participants.  
287 The study protocol was approved by the Siriraj Institutional Review Board (COA no. Si  
288 537/2021). The study was registered in [thaichinicaltrials.org](http://thaichinicaltrials.org) (TCTR20210719006).

289

### 290 **Study Procedures**

291 Eligible participants were openly assigned to receive one of the four intramuscular  
292 booster vaccinations: BBIBP-CorV (Sinopharm), ChAdOx1 (AstraZeneca), full dose [30 µg] or  
293 half dose [15 µg] BNT162b2 (Pfizer). Due to the shortage of study vaccines during the peak of  
294 the outbreak when the enrollment started, the study vaccine was assigned to the participant by  
295 order of confirmation to participate in the study and the type of vaccine available on that day.

296 After about 4 weeks of enrollment, the BBIBP-CorV booster group was terminated after the  
297 preliminary analysis that found low anti-SARS-CoV-2 RBD concentration.

298 The participants were observed for at least 30 min following vaccination for any  
299 immediate adverse events (AE) and were instructed to record self-assessment signs or symptoms  
300 in an electronic diary (eDiary) for seven days after vaccination. An AE were defined as described  
301 in the previous study [7].

302 Blood samples were collected at baseline (pre-booster), two weeks, and 16-20 weeks  
303 after booster vaccination to determine the anti-SARS-CoV-2 RBD IgG antibody levels. A subset  
304 of samples at two weeks and 16-20 weeks post-booster were tested for neutralizing antibodies  
305 against the SARS-CoV-2 Delta and Beta variants using the 50% plaque reduction neutralization  
306 test (PRNT<sub>50</sub>) and against Delta and Omicron variants using the pseudovirus neutralization test  
307 (PVNT). The groups that received BBIPB-CorV as booster or ChAdOx1 as priming and booster  
308 (3-dose ChAdOx1) were not followed up for the 16-20 weeks analysis; the participants have  
309 received additional booster vaccination outside of this study at approximately 4 weeks after  
310 receiving the study vaccination due to the low antibody response. Cellular immunity was  
311 measured at baseline using the QuantiFERON SARS-CoV-2 interferon gamma release assay  
312 (IGRA). Participants with a negative IGRA response at baseline were tested again at two weeks  
313 post-booster.

314

### 315 **Laboratory Assays**

316 *Chemiluminescent microparticle assay (CMIA) for anti-SARS-CoV-2 RBD IgG*

317 The anti-RBD IgG was measured by CMIA using the SARS-CoV-2 IgG II Quant  
318 (Abbott, List No. 06S60) on the ARCHITECT I System as described in previous study<sup>7</sup>. Samples  
319 with a value >11,360 BAU/mL were reported as 11,360 BAU/mL.

320

321 *50% plaque reduction neutralization test (PRNT)*

322 The standard live virus 50% plaque reduction neutralization test (PRNT<sub>50</sub>) against Delta  
323 variant (B.1.617.2) and Beta variant (B.1.351) were performed as described in the previous  
324 study<sup>7</sup>. The PRNT<sub>50</sub> titer is defined as the the highest test serum dilution for which the virus  
325 infectivity is reduced by 50% when compared with the average plaque counts of the virus control  
326 (no serum). The PRNT<sub>50</sub> titer of 5 was used for all samples that were below the detectable level  
327 (1:10).

328

329 *Pseudovirus neutralization assay (PVNT)*

330 Codon-optimized gene encoding the spike of Omicron (B.1.1.529/ BA.1) and Delta  
331 (B.1.617.2) were generated by gene synthesis (Genscript) and cloned into the pCAGGS  
332 expressing plasmid by In-Fusion assembly (Clontech). Pseudovirus was generated and  
333 concentrated as previously described [37]. Pseudotype-based neutralization assays were carried  
334 out as described previously [37]. The 50% pseudovirion neutralizing antibody titer (PVNT<sub>50</sub>)  
335 was calculated by interpolating the point at which infectivity was reduced to 50% of the value for  
336 the control samples (no serum).

337

338 *QuantiFERON SARS-CoV-2 interferon gamma release assay (IGRA)*

339 SARS-CoV-2 specific T cell responses were assessed by whole blood IGRA using  
340 QIAGEN's proprietary mixes of SARS-CoV-2 S protein designed for CD4+ T cell (Ag1), CD8+  
341 T cells (Ag2) according to the manufacturer's instruction. Interferon-gamma (IFN- $\gamma$ )  
342 concentration was measured with an automated QuantiFERON SARS-CoV-2 ELISA instrument  
343 and reported in International Units per mL (IU/mL) [38,39]. The cut-off for positivity was  
344 determined as the level above the mean plus three standard deviations of the negative control.  
345 The cut-offs for Ag1 ( $>0.12$  IU/mL) and Ag2 ( $>0.17$  IU/mL) were determined based on 61  
346 SARS-CoV-2 negative control samples. A positive response to either of the two peptides pools  
347 was considered positive.

#### 348 **Statistical Analysis**

349 The sample size was calculated using the lower bounds of anti-RBD IgG geometric mean  
350 concentration (GMC) from previous study[7]. A sample size of 50 participants in each group  
351 would provide us 80% power to detect any difference between groups.

352 The AEs endpoints were presented as frequencies and Chi-square test was used to test for  
353 statistical difference. The anti-SARS-CoV-2 RBD IgG concentration and neutralization  
354 antibodies were reported as GMC and geometric mean titers (GMT) with 95% confidence  
355 interval (CI), respectively. Anti-RBD IgG GMC and PRNT<sub>50</sub> GMTs at two weeks after the  
356 primary series (post-primary series) from our previous study was used for comparison [7]: the  
357 anti-RBD IgG GMC for CoronaVac and ChAdOx1 was 164.4 BAU/mL and 278.5 BAU/mL,  
358 respectively and the PRNT<sub>50</sub> GMT was 21.2 and 69.7 for Delta variant and 10.2 and 43.5 for  
359 Beta variant, respectively [7]. The geometric mean ratio (GMR) with 95% CI was analyzed  
360 between the post-boosting levels or titers and post-primary series levels or titers references.  
361 Paired *t* test, unpaired *t* test, and analysis of variance (ANOVA) were used to compare GMC and



362 GMT within group, between groups, and across groups using GraphPad Prism 9 version 9.2.0  
363 (283) (GraphPad Software, CA, USA), respectively. Other statistical analyses were conducted  
364 using STATA version 17 (Stata Corp, LP, College Station, TX, USA).

365

### 366 **Acknowledgement**

367 The authors gratefully acknowledge the Siriraj Institute of Clinical Research (SICRES) team,  
368 Abbott Laboratories Ltd. for technical supports and all health care workers who took part and  
369 enabled this study to be possible. We are also grateful to Professors Kim Mulholland and Paul  
370 Licciardi, Murdoch Children's Research Institute, who provided review and critical comments to  
371 improve the study and the manuscript.

372

### 373 **Author Contributions**

374 N.A. and S.N. equally contributed to the research work. Conceptualization and Methodology:  
375 N.A., S.N., J.S., K.R., Y.J, K.S; Formal analysis and data curation: N.A., J.S., S.N. Z.Q.T.;  
376 Project administration, N.A, J.S., S.N.; Supervision, K.C.; Resources and Funding, K.C. All  
377 authors involved with investigation, and writing-review and editing.

378

### 379 **Data availability statement**

380 Data are available upon reasonable request.

381

### 382 **Conflict of Interest Declaration**

383 All authors declare no personal or professional conflicts of interest, and no financial support  
384 from the companies that produce and/or distribute the drugs, devices, or materials described in  
385 this report.

386

### 387 **Funding Disclosure**

388 This study was supported by the National Research Council of Thailand [grant number  
389 N35A640369]. The Abbott Laboratories Ltd. partially supported the reagents for the anti-SARS-  
390 CoV-2 RBD IgG in this study. The funder had no role in study design, data collection, data  
391 analysis, data interpretation, or writing of the report.

392

393

394

395

396

397

398

399

400

401

402

403

404

405

406 **References**

- 407 1. Tanriover, M. *et al.* Efficacy and safety of an inactivated whole-virion SARS-CoV-2  
408 vaccine (CoronaVac): interim results of a double-blind, randomised, placebo-controlled, phase 3  
409 trial in Turkey. *Lancet* **398**, 213-222 (2021).
- 410 2. Voysey, M. *et al.* Safety and efficacy of the ChAdOx1 nCoV-19 vaccine (AZD1222)  
411 against SARS-CoV-2: an interim analysis of four randomised controlled trials in Brazil, South  
412 Africa, and the UK. *Lancet* **397**, 99-111 (2021).
- 413 3. Jara, A. *et al.* Effectiveness of an Inactivated SARS-CoV-2 Vaccine in Chile. *N. Engl. J.*  
414 *Med.* **385**, 875-884 (2021).
- 415 4. Lopez, B. J. *et al.* Effectiveness of Covid-19 Vaccines against the B.1.617.2 (Delta)  
416 Variant. *N. Engl. J. Med.* **385**, 585-594 (2021).
- 417 5. Li, X. *et al.* Effectiveness of inactivated SARS-CoV-2 vaccines against the Delta variant  
418 infection in Guangzhou: a test-negative case-control real-world study. *Emerg. Microbes. Infect.*  
419 **10**, 1751-1759 (2021).
- 420 6. Mallapaty, S. China's COVID vaccines have been crucial — now immunity is waning.  
421 <https://www.nature.com/articles/d41586-021-02796-w> (2021).
- 422 7. Angkasekwinai, N. *et al.* Safety and Immunogenicity of CoronaVac and ChAdOx1  
423 Against the SARS-CoV-2 Circulating Variants of Concern (Alpha, Delta, Beta) in Thai  
424 Healthcare Workers. Preprint at  
425 <https://www.medrxiv.org/content/10.1101/2021.10.03.21264451v1.full> (2021).
- 426 8. Mallapaty, S. *et al.* How COVID vaccines shaped 2021 in eight powerful charts.  
427 <https://www.nature.com/articles/d41586-021-03686-x> (2021).

- 428 9. Khoury D. et al. Neutralizing antibody levels are highly predictive of immune protection  
429 from symptomatic SARS-CoV-2 infection. *Nat. Med.* **27**, 1205-1211 (2021).
- 430 10. Naaber, P. et al. Dynamics of antibody response to BNT162b2 vaccine after six months:  
431 a longitudinal prospective study. *Lancet. Reg. Health. Eur.* **10**, 100208 (2021).
- 432 11. Lopez, B. J. et al. Effectiveness of the Pfizer-BioNTech and Oxford-AstraZeneca  
433 vaccines on covid-19 related symptoms, hospital admissions, and mortality in older adults in  
434 England: test negative case-control study. *BMJ* n1088 (2021).
- 435 12. AIQahtani, M. et al. Morbidity and mortality from COVID-19 post-vaccination  
436 breakthrough infections in association with vaccines and the emergence of variants in Bahrain.  
437 Preprint at [https://assets.researchsquare.com/files/rs-828021/v1\\_covered.pdf?c=1629920029](https://assets.researchsquare.com/files/rs-828021/v1_covered.pdf?c=1629920029)  
438 (2021).
- 439 13. Dejnirattisai, W. et al. Reduced neutralisation of SARS-CoV-2 omicron B.1.1.529 variant  
440 by post-immunisation serum. *Lancet* **399**, 234-236 (2022).
- 441 14. Borobia, A. et al. Immunogenicity and reactogenicity of BNT162b2 booster in  
442 ChAdOx1-S-primed participants (CombiVacS): a multicentre, open-label, randomised,  
443 controlled, phase 2 trial. *Lancet* **398**, 121-130 (2021).
- 444 15. Barros-Martins, et al. Humoral and cellular immune response against SARS-CoV-2  
445 variants following heterologous and homologous ChAdOx1 nCoV-19/BNT162b2 vaccination.  
446 Preprint at <https://doi.org/10.1101/2021.06.01.21258172> (2021).
- 447 16. Groß, R. et al. Heterologous ChAdOx1 nCoV-19 and BNT162b2 prime-boost  
448 vaccination elicits potent neutralizing antibody responses and T cell reactivity against prevalent  
449 SARS-CoV-2 variants. *EBioMedicine* **75**, 103761 (2022).

- 450 17. Yorsaeng, R. *et al.* Immune response elicited from heterologous SARS-CoV-2  
451 vaccination: Sinovac (CoronaVac) followed by AstraZeneca (Vaxzevria). Preprint at  
452 <https://doi.org/10.1101/2021.09.01.21262955> (2021).
- 453 18. Nordström, P., Ballin, M. & Nordström, A. Effectiveness of heterologous ChAdOx1  
454 nCoV-19 and mRNA prime-boost vaccination against symptomatic Covid-19 infection in  
455 Sweden: A nationwide cohort study. *Lancet Reg. Health. Eur.* **11**, 100249 (2021).
- 456 19. Choi, A. *et al.* Safety and immunogenicity of SARS-CoV-2 variant mRNA vaccine  
457 boosters in healthy adults: an interim analysis. *Nat. Med.* **27**, 2025-2031 (2021).
- 458 20. Menni, C. *et al.* Vaccine side-effects and SARS-CoV-2 infection after vaccination in  
459 users of the COVID Symptom Study app in the UK: a prospective observational study. *Lancet*  
460 *Infect. Dis.* **21**, 939-949 (2021).
- 461 21. Munro, A. *et al.* Safety and immunogenicity of seven COVID-19 vaccines as a third dose  
462 (booster) following two doses of ChAdOx1 nCov-19 or BNT162b2 in the UK (COV-BOOST): a  
463 blinded, multicentre, randomised, controlled, phase 2 trial. *Lancet* **398**, 2258-2276 (2021).
- 464 22. Costa Clemens, S. A. *et al.* Heterologous versus homologous COVID-19 booster  
465 vaccination in previous recipients of two doses of CoronaVac COVID-19 vaccine in Brazil  
466 (RHH-001): a phase 4, non-inferiority, single blind, randomised study. *Lancet* (2022).
- 467 23. Liu, X. *et al.* Safety and immunogenicity of heterologous versus homologous prime-boost  
468 schedules with an adenoviral vectored and mRNA COVID-19 vaccine (Com-COV): a single-  
469 blind, randomised, non-inferiority trial. *Lancet* **398**, 856-869 (2021).
- 470 24. Perez-Then, E. *et al.* Neutralizing antibodies against the SARS-CoV-2 Delta and  
471 Omicron variants following heterologous CoronaVac plus BNT162b2 booster vaccination. *Nat.*  
472 *Med.* (2022).

- 473 25. Cheng, S. M. S. *et al.* Neutralizing antibodies against the SARS-CoV-2 Omicron variant  
474 following homologous and heterologous CoronaVac or BNT162b2 vaccination. *Nat. Med.*  
475 (2022).
- 476 26. Carreño J. *et al.* Activity of convalescent and vaccine serum against SARS-CoV-2.  
477 <https://www.nature.com/articles/s41586-022-04399-5> (2021).
- 478 27. Ferguson, N. *et al.* Report 49: Growth, population distribution and immune escape of  
479 Omicron in England. [https://www.imperial.ac.uk/mrc-global-infectious-disease-analysis/covid-](https://www.imperial.ac.uk/mrc-global-infectious-disease-analysis/covid-19/report-49-Omicron)  
480 [19/report-49-Omicron](https://www.imperial.ac.uk/mrc-global-infectious-disease-analysis/covid-19/report-49-Omicron) (2021).
- 481 28. Yang, W. & Shaman, J. SARS-CoV-2 transmission dynamics in South Africa and  
482 epidemiological characteristics of the Omicron variant. Preprint at  
483 <https://doi.org/10.1101/2021.12.19.21268073> (2021).
- 484 29. Garcia-Beltran, W. *et al.* mRNA-based COVID-19 vaccine boosters induce neutralizing  
485 immunity against SARS-CoV-2 Omicron variant. *Cell* (2021).
- 486 30. Kuhlmann, C. *et al.* Breakthrough infections with SARS-CoV-2 omicron despite mRNA  
487 vaccine booster dose. *Lancet* (2022).
- 488 31. Kamar, N. *et al.* Assessment of 4 Doses of SARS-CoV-2 Messenger RNA-Based  
489 Vaccine in Recipients of a Solid Organ Transplant. *JAMA Netwk. Open.* **4**, e2136030 (2021).
- 490 32. Burki, T. Fourth dose of COVID-19 vaccines in Israel. *Lancet. Respir. Med.* (2022).
- 491 33. Folegatti, P. *et al.* Safety and immunogenicity of the ChAdOx1 nCoV-19 vaccine against  
492 SARS-CoV-2: a preliminary report of a phase 1/2, single-blind, randomised controlled trial.  
493 *Lancet* **396**, 467-478 (2020).

- 494 34. Ramasamy, M. *et al.* Safety and immunogenicity of ChAdOx1 nCoV-19 vaccine  
495 administered in a prime-boost regimen in young and old adults (COV002): a single-blind,  
496 randomised, controlled, phase 2/3 trial. *Lancet* **396**, 1979-1993 (2020).
- 497 35. Zhang, Y. *et al.* Safety, tolerability, and immunogenicity of an inactivated SARS-CoV-2  
498 vaccine in healthy adults aged 18-59 years: a randomised, double-blind, placebo-controlled,  
499 phase 1/2 clinical trial. *Lancet. Infect. Dis.* **21**, 181-192 (2021).
- 500 36. Vályi-Nagy, I. *et al.* Comparison of antibody and T cell responses elicited by BBIBP-  
501 CorV (Sinopharm) and BNT162b2 (Pfizer-BioNTech) vaccines against SARS-CoV-2 in healthy  
502 adult humans. *GeroScience* **43**, 2321-2331 (2021).
- 503 37. Koonpaew, S. *et al.* A Single-Cycle Influenza A Virus-Based SARS-CoV-2 Vaccine  
504 Elicits Potent Immune Responses in a Mouse Model. *Vaccines* **9**, 850 (2021).
- 505 38. Murugesan, K. *et al.* Interferon- $\gamma$  Release Assay for Accurate Detection of Severe Acute  
506 Respiratory Syndrome Coronavirus 2 T-Cell Response. *Clin. Infect. Dis.* **73**, 3130-e3132 (2020).
- 507 39. Martínez-Gallo, M. *et al.* Commercialized kits to assess T-cell responses against SARS-  
508 COV-2 s peptides. A pilot study in health care workers. *Med. Clín. (Barc)*. (2021).
- 509  
510  
511  
512  
513  
514  
515  
516

517 **Figure Legends**

518 **Figure 1.** Adverse events following four different booster vaccinations. The stacked bars  
519 represent the percentage of participants who reported mild and moderate adverse events after the  
520 booster vaccinations in the subjects who had received 2-dose CoronaVac-primary series (A) and  
521 ChAdOx1-primary series (B) vaccination. Chi-square was used for statistical analyses.

522

523 **Figure 2.** SARS-CoV-2 RBD IgG 2 weeks after booster vaccination. The scatter dot plot  
524 represents the SARS-CoV-2 RBD IgG concentration before and 2 weeks after different booster  
525 vaccination in participants who received 2-dose CoronaVac primary series (A) or ChAdOx1-  
526 primary series (B) 8-12 weeks prior. (C) Comparison of SARS-CoV-2 RBD IgG levels at 2  
527 weeks after booster vaccination between participants who received CoronaVac primary series  
528 (blue) or ChAdOx1 primary series (red). Error bars represent geometric mean and 95%  
529 confidence interval. The upper dotted line represents the geometric mean concentration (GMC)  
530 of SARS-CoV-2 RBD IgG at 2 weeks after the second dose of the 2-dose primary series of  
531 CoronaVac or ChAdOx1[7]. The lower dotted line represents the cut-off level for seropositivity.

532

533 **Figure 3.** Plaque reduction neutralization titers (PRNT<sub>50</sub>) for SARS-CoV-2 Delta and Beta  
534 variants. Scatter dot plots represent PRNT<sub>50</sub> titer against the (A) Delta or (B) Beta variant at 2  
535 weeks after different booster vaccines in participants who received two doses of Coronavac or  
536 ChAdOx1 8-12 weeks earlier. (C) Comparison of PRNT<sub>50</sub> between SARS-CoV-2 Delta (green)  
537 and Beta (pink) variants 2 weeks after booster vaccination. Error bars represent geometric mean  
538 titer (GMT) and 95% confidence interval (CI). The upper dotted line represents the geometric  
539 mean values of anti-SARS-CoV-2 RBD IgG at 2 weeks after the second dose of the 2-dose



540 primary series of CoronaVac or ChAdOx1 [7]. Lower dot line represents the cut-off level for  
541 seropositivity.

542

543 **Figure 4.** Pseudovirion neutralization titers (PVNT<sub>50</sub>) for SARS-CoV-2 Delta and Omicron  
544 variants. Aligned dot plots represent PVNT<sub>50</sub> against the (A) Delta or (B) Omicron variant at 2  
545 weeks after different booster vaccines in participants who received two doses of Coronavac or  
546 ChAdOx1 8-12 weeks earlier. (C) Comparison of PRNT<sub>50</sub> between SARS-CoV-2 Delta (green)  
547 and Omicron (purple) variants 2 weeks after booster vaccination. PVNT<sub>50</sub> titer against the Delta  
548 (D) or (E) Omicron variant at 2 weeks and 16-20 weeks of the same participants after different  
549 booster vaccines. Error bars represent geometric mean titer (GMT) and 95% confidence interval  
550 (CI).

551

552 **Supplementary Figure S1.** Correlation between the level of anti-SARS-CoV-2 RBD IgG  
553 and plaque reduction neutralization test (PRNT<sub>50</sub>) titers for the SARS-CoV-2 Delta and Beta  
554 variants. Dot plots show the correlation between the level of anti-SARS-CoV-2 RBD IgG and  
555 PRNT<sub>50</sub> titer against the Delta participants who have previously received two doses of  
556 CoronaVac (A) or ChAdOx1 (B) or Beta variant in participants who had completed two doses of  
557 CoronaVac (C) or ChAdOx1 (D) 2 weeks after booster with BBIBP-CorV (green), ChAdOX1  
558 (red), 30 µg BNT162b2 (orange) and 15 µg BNT162b2 (yellow). Pearson's correlation  
559 coefficient (r) with *p* value for each booster vaccine indicated.

560

561 **Supplementary Figure S2.** Cellular immune responses by interferon-gamma (IFN $\gamma$ ) releasing  
562 assay (IGRA). (A) Scatter dot plots represent the level of IFN $\gamma$  following stimulation with either

563 Ag1 or Ag2 at 8-12 weeks after two doses of CoronaVac or ChAdOx1 (before booster  
564 vaccination). Aligned dot plots show the level of IFN $\gamma$  following stimulation with stimulated  
565 with either **(B)** Ag1 or **(C)** Ag2 in samples collected before (teal) and 2 weeks after (pink)  
566 booster with BBIBP-CorV, ChAdOX1, 30  $\mu$ g BNT162b2 and 15  $\mu$ g BNT162b2. Median and  
567 interquartile range (IQR) of each group are indicated. IU/mL: international units per mL.

**Table 1. Baseline characteristics of participants**

|                                        | Type of booster vaccinations |                      |                        |                        | <i>p</i> -value |
|----------------------------------------|------------------------------|----------------------|------------------------|------------------------|-----------------|
|                                        | BBIBP-CorV<br>n=14           | ChAdOx1<br>n=65      | 30 µg BNT162b2<br>n=50 | 15 µg BNT162b2<br>n=50 |                 |
| <b>Corona Vac-prime (n=179)</b>        |                              |                      |                        |                        |                 |
| Age (years), median (IQR)              | 31<br>(27, 41.5)             | 36.6<br>(29.5, 44)   | 32<br>(28, 41.8)       | 40<br>(31.5, 45.3)     | 0.018           |
| Female, n (%)                          | 12 (85.7)                    | 51 (78.5)            | 40 (80.0)              | 33 (66.0)              | 0.249           |
| BMI (kg/m <sup>2</sup> ), median (IQR) | 25.2<br>(21.1, 31.6)         | 23.4<br>(20.9, 27.1) | 22.1<br>(19.5, 25.5)   | 23.9<br>(20.9, 26.0)   | 0.325           |
| <b>ChAdOx1-prime (n=173)</b>           |                              |                      |                        |                        |                 |
|                                        | BBIBP-CorV<br>n=23           | ChAdOx1<br>n=50      | 30 µg BNT162b2<br>n=50 | 15 µg BNT162b2<br>n=50 | <i>p</i> -value |
| Age (years), median (IQR)              | 51<br>(42, 59)               | 45.5<br>(36, 57)     | 34<br>(30, 43)         | 41.5<br>(34, 49.5)     | 0.001           |
| Female, n (%)                          | 21 (91.3)                    | 47 (94.0)            | 37 (74.0)              | 44 (88.0)              | 0.001           |
| BMI (kg/m <sup>2</sup> ), median (IQR) | 24.8<br>(22.4, 27.6)         | 23.8<br>(21.3, 26.7) | 21.4<br>(19.3, 24.7)   | 23.3<br>(20.4, 26.5)   | 0.001           |

**Table 2. The 50% plaque reduction neutralization (PRNT<sub>50</sub>) and 50% pseudovirus neutralization (PVNT<sub>50</sub>) geometric mean antibody titers (GMT) against variant.**

| Corona Vac-prime (n=104)                                                          | Type of booster vaccinations |                                  |                                    |                                    | p-value |
|-----------------------------------------------------------------------------------|------------------------------|----------------------------------|------------------------------------|------------------------------------|---------|
|                                                                                   | BBIBP-CorV<br>n=14           | ChAdOx1<br>n=30                  | 30 µg BNT162b2<br>n=30             | 15 µg BNT162b2<br>n=30             |         |
| <b>PRNT<sub>50</sub> at 2 weeks after boosting</b>                                |                              |                                  |                                    |                                    |         |
| GMT (95% CI) against Delta variant                                                | 61.3<br>(35.07, 107.02)      | 271.2<br>(222.54, 330.49)        | 411.1<br>(311.71, 542.16)          | 499.12<br>(418.54, 595.21)         | <0.0001 |
| GMR (95% CI) between post-boosting and post-primary series* against Delta variant | 2.89<br>(1.52, 5.50)         | 12.79<br>(9.06, 18.06)           | 19.39<br>(13.04, 28.84)            | 23.54<br>(16.89, 32.82)            | <0.0001 |
| GMT (95% CI) against Beta variant                                                 | 37.2<br>(18.00, 76.91)       | 170.5<br>(124.65, 233.13)        | 306.7<br>(221.44, 424.71)          | 322.8<br>(239.34, 435.25)          | <0.0001 |
| GMR (95% CI) between post-boosting and post-primary series* against Beta variant  | 3.65<br>(1.65, 8.08)         | 16.72<br>(11.11, 25.15)          | 30.07<br>(19.79, 45.69)            | 31.65<br>(21.27, 47.09)            | <0.0001 |
| <b>PVNT<sub>50</sub> at 2 weeks after boosting</b>                                |                              |                                  |                                    |                                    |         |
| GMT (95% CI) against Delta variant                                                | 24.31<br>(3.42, 172.56)      | 586.65<br>(437.72, 786.25)       | 1,584.8<br>(1,192.1, 2,106.9)      | 1,512.7<br>(1,061.6, 2,155.5)      | <0.0001 |
| GMT (95% CI) against Omicron variant                                              | 0.70<br>(0.55, 8.96)         | 169.59<br>(111.80, 257.26)       | 542.6<br>(317.52, 927.25)          | 551.29<br>(384.25, 790.96)         | <0.0001 |
| <b>PVNT<sub>50</sub> at 16-20 weeks after boosting</b>                            |                              |                                  |                                    |                                    |         |
| GMT (95% CI) against Delta variant                                                | NA                           | n=20<br>93.22<br>(65.18, 133.33) | n=20<br>212.46<br>(143.96, 313.54) | n=20<br>164.86<br>(121.38, 223.91) | 0.0012  |
| GMT (95% CI) against Omicron variant                                              | NA                           | 1.39<br>(0.21, 9.10)             | 54.34<br>(17.76, 166.25)           | 22.33<br>(4.68, 106.44)            | 0.001   |
| <b>ChAdOx1-prime (n=112)</b>                                                      |                              |                                  |                                    |                                    |         |
|                                                                                   | BBIBP-CorV<br>n=22           | ChAdOx1<br>n=30                  | 30 µg BNT162b2<br>n=30             | 15 µg BNT162b2<br>n=30             | p-value |
| <b>PRNT<sub>50</sub> at 2 weeks after boosting</b>                                |                              |                                  |                                    |                                    |         |
| GMT (95% CI) against Delta variant                                                | 49.0<br>(37.56, 64.05)       | 69.1<br>(50.14, 95.14)           | 470.1<br>(395.49, 558.89)          | 358.4<br>(276.13, 465.26)          | <0.0001 |
| GMR (95% CI) between post-boosting and post-primary series* against Delta variant | 0.70<br>(0.44, 1.12)         | 0.99<br>(0.60, 1.63)             | 6.74<br>(4.45, 10.23)              | 5.14<br>(3.24, 8.16)               | <0.0001 |
| GMT (95% CI) against Beta variant                                                 | 28.1<br>(18.08, 43.53)       | 38.2<br>(26.06, 56.05)           | 292.9<br>(233.73, 367.17)          | 250.0<br>(182.95, 341.51)          | <0.0001 |
| GMR (95% CI) between post-boosting and post-primary series* against Beta variant  | 0.65<br>(0.36, 1.15)         | 0.88<br>(0.52, 1.49)             | 6.73<br>(4.42, 10.26)              | 5.75<br>(3.57, 9.24)               | <0.0001 |
| <b>PVNT<sub>50</sub> at 2 weeks after boosting</b>                                |                              |                                  |                                    |                                    |         |
| GMT (95% CI) against Delta variant                                                | 17.15<br>(4.80, 61.29)       | 120.6<br>(77.63, 187.36)         | 1,081.2<br>(797.92, 1,465.1)       | 720.66<br>(505.26, 1,027.9)        | <0.0001 |
| GMT (95% CI) against Omicron variant                                              | 0.10<br>(0.02, 0.52)         | 3.25<br>(0.60, 17.53)            | 521.16<br>(396.91, 684.30)         | 232.31<br>(155.20, 347.72)         | <0.0001 |
| <b>PVNT<sub>50</sub> at 16-20 weeks after boosting</b>                            |                              |                                  |                                    |                                    |         |
| GMT (95% CI) against Delta variant                                                | NA                           | NA                               | n=20<br>207.1<br>(158.57, 270.47)  | n=20<br>178.63<br>(120.49, 264.83) | 0.0012  |
| GMT (95% CI) against Omicron variant                                              | NA                           | NA                               | 116.88                             | 14.04                              | 0.001   |

---

(76.94, 177.54) (3.138, 62.83)

---

\* The geometric mean ratio (GMR) of PRNT50 between post-boosting and post-primary series. The post primary series GMC was derived from the study in the same setting as the current study [7]. The post primary series GMT (95% CI) at 2 weeks after the second dose of the 2-dose homologous CoronaVac, 4 weeks apart, were 21.2 (16.07, 27.87) and 10.2 (7.92, 13.12) against Delta and Beta variants, respectively; and after 2-dose homologous ChAdOx1, 10 weeks apart, were 69.7 (48.08, 101.00) and 43.5 (30.73, 61.72) against Delta and Beta variants, respectively.

CI: confidence interval; IQR: interquartile range

**Supplementary Table 1. Adverse events of following booster vaccination**

| Adverse events (AEs)           | BBIBP-CorV  | ChAdOx1     | 30 µg<br>BNT162b2 | 15 µg<br>BNT162b2 | <i>p</i> -value |
|--------------------------------|-------------|-------------|-------------------|-------------------|-----------------|
| <b>CoronaVac-prime (n=179)</b> | <b>n=14</b> | <b>n=65</b> | <b>n=50</b>       | <b>n=50</b>       |                 |
| Overall AEs (%)                | 10 (71.43)  | 64 (98.46)  | 46 (92.0)         | 40 (80.0)         | 0.002           |
| Injection site reaction (%)    | 9 (64.29)   | 62 (95.38)  | 46 (92.00)        | 36 (72.00)        | <0.001          |
| Fatigue (%)                    | 2 (14.29)   | 46 (70.77)  | 26 (52.0)         | 10 (20.00)        | <0.001          |
| Headache (%)                   | 1 (7.14)    | 12 (18.46)  | 25 (50.0)         | 18 (36.0)         | <0.001          |
| Myalgia (%)                    | 6 (42.86)   | 54 (83.08)  | 2 (4.0)           | 1 (2.0)           | <0.001          |
| Malaise (%)                    | 0           | 1 (1.54)    | 31 (62.0)         | 20 (40.0)         | <0.001          |
| Nausea (%)                     | 2 (14.29)   | 20 (30.77)  | 7 (14.0)          | 5 (10.0)          | 0.119           |
| Diarrhea (%)                   | 1 (7.14)    | 12 (18.46)  | 3 (6.0)           | 6 (12.0)          | 0.284           |
| Fever (%)                      | 1 (7.14)    | 25 (38.46)  | 4 (8.0)           | 1 (2.0)           | <0.001          |
| Rash (%)                       | 2 (14.29)   | 9 (13.85)   | 7 (14.0)          | 2 (4.0)           | 0.341           |
| Somnolence (%)                 | 0           | 0           | 2 (4.0)           | 2 (4.0)           | 0.357           |
| Flu-like symptoms (%)          | 0           | 4 (6.15)    | 1 (2.0)           | 1 (2.0)           | 0.453           |
| Arthralgia (%)                 | 0           | 2 (3.08)    | 1 (2.0)           | 1 (2.0)           | 0.906           |
| Dizziness (%)                  | 0           | 1 (1.54)    | 1 (2.0)           | 0                 | 0.758           |
| Paresthesia (%)                | 2 (14.29)   | 1 (1.54)    | 1 (2.0)           | 0                 | 0.014           |
| Vomiting (%)                   | 0           | 4 (6.15)    | 0                 | 1 (2.0)           | 0.199           |
| <b>ChAdOx1-prime (n=173)</b>   | <b>n=23</b> | <b>n=50</b> | <b>n=50</b>       | <b>n=50</b>       |                 |
| Overall AEs (%)                | 14 (60.87)  | 36 (72.0)   | 49 (958.0)        | 44 (89.0)         | <0.001          |
| Injection site reaction (%)    | 9 (39.13)   | 28 (56.0)   | 47 (94.00)        | 44 (88.00)        | <0.001          |
| Fatigue (%)                    | 3 (13.04)   | 18 (36.0)   | 34 (68.0)         | 20 (40.00)        | <0.001          |
| Headache (%)                   | 6 (26.09)   | 15 (30.0)   | 28 (56.0)         | 28 (56.0)         | 0.024           |
| Myalgia (%)                    | 6 (42.86)   | 54 (83.08)  | 2 (4.0)           | 1 (2.0)           | <0.001          |
| Malaise (%)                    | 7 (30.43)   | 21 (42.0)   | 34 (68.0)         | 37 (74)           | 0.001           |
| Nausea (%)                     | 1 (4.35)    | 20 (30.77)  | 7 (14.0)          | 5 (10.0)          | 0.102           |
| Diarrhea (%)                   | 1 (4.35)    | 5 (10.0)    | 8 (16.0)          | 6 (10.0)          | 0.834           |
| Fever (%)                      | 1 (4.35)    | 2 (4.0)     | 4 (8.0)           | 1 (2.0)           | 0.240           |
| Rash (%)                       | 0           | 1 (2.0)     | 1 (2.0)           | 0                 | 0.688           |
| Somnolence (%)                 | 0           | 1 (2.0)     | 2 (4.0)           | 0                 | 0.421           |
| Flu like symptoms (%)          | 0           | 1 (2.0)     | 2 (4.0)           | 2 (4.0)           | 0.738           |
| Arthralgia (%)                 | 0           | 0           | 0                 | 1 (2.0)           | 0.480           |
| Dizziness (%)                  | 2 (8.70)    | 1 (2.0)     | 0                 | 0                 | 0.118           |
| Paresthesia (%)                | 0           | 0           | 0                 | 0                 | -               |
| Vomiting (%)                   | 0           | 3 (6.0)     | 0                 | 0                 | 0.057           |

**Supplementary Table 2. Anti-RBD IgG geometric mean concentration (GMC) and the geometric mean ratio (GMR) between post boosting and pre-boosting (baseline) or post primary series\* and IGRA positive rate**

| Anti-RBD IgG geometric mean concentration (GMC), BAU/mL                                    | Type of booster vaccinations |                              |                              |                              |                              |
|--------------------------------------------------------------------------------------------|------------------------------|------------------------------|------------------------------|------------------------------|------------------------------|
|                                                                                            | BBIBP-CorV<br>n=14           | ChAdOx1<br>n=65              | 30 µg BNT162b2<br>n=50       | 15 µg BNT162b2<br>n=50       | p-value<br>between<br>groups |
| <b>Corona Vac-prime (n=179)</b>                                                            |                              |                              |                              |                              |                              |
| GMC (95%CI) at baseline                                                                    | 34.32<br>(22.33, 52.77)      | 38.18<br>(31.21, 46.71)      | 33.31<br>(26.72, 41.53)      | 37.67<br>(31.65, 44.84)      | 0.7616                       |
| GMC (95%CI) at 2 weeks after boosting                                                      | 154.6<br>(92.11, 259.47)     | 1358.0<br>(1141.84, 1615.07) | 5152.2<br>(4491.65, 5909.83) | 3981.1<br>(3397.15, 4665.42) | <0.0001                      |
| GMR (95% CI) between 2 weeks after boosting and baseline                                   | 4.5<br>(2.98, 6.80)          | 35.6<br>(29.18, 43.34)       | 154.7<br>(124.30, 192.50)    | 105.7<br>(90.31, 123.68)     | <0.0001                      |
| GMR (95% CI) between 2 weeks after boosting and 2 weeks after primary series of CoronaVac* | 0.94<br>(0.53, 1.67)         | 8.26<br>(6.29, 10.85)        | 31.34<br>(24.37, 40.30)      | 24.22<br>(18.60, 31.54)      | <0.0001                      |
| GMC (95%CI) at 16-20 weeks after boosting                                                  | NA                           | 291.32<br>(247.92, 342.33)   | 774.85<br>(653.33, 918.98)   | 525.31<br>(428.37, 644.18)   | <0.0001                      |
| Baseline SARS-CoV-2 IGRA positive, n (%)                                                   | 5 (35.7)                     | 12 (18.5)                    | 16 (32)                      | 12 (24)                      | 0.301                        |
| Post-boosting IGRA positive among baseline negative participants, n (%)                    | 1/9<br>(11.1)                | 26/53<br>(49.1)              | 28/34<br>(82.4)              | 30/38<br>(79.0)              | <0.0001                      |
| <b>ChAdOx1-prime (n=173)</b>                                                               |                              |                              |                              |                              |                              |
|                                                                                            | BBIBP-CorV<br>n=23           | ChAdOx1<br>n=50              | 30 µg BNT162b2<br>n=49       | 15 µg BNT162b2<br>n=50       | p-value<br>between<br>groups |
| GMC (95%CI) at baseline                                                                    | 106.6<br>(70.89, 160.29)     | 105.7<br>(80.97, 137.97)     | 95.98<br>(75.84, 121.45)     | 90.11<br>(73.62, 110.30)     | 0.7661                       |
| GMC (95%CI) 2 weeks after boosting                                                         | 128.1<br>(93.52, 175.37)     | 246.4<br>(199.59, 304.20)    | 2363.8<br>(2005.58, 2786.06) | 1961.9<br>(1624.61, 2369.10) | <0.0001                      |
| GMR (95% CI) between 2 weeks after boosting and baseline                                   | 1.2<br>(1.01, 1.43)          | 2.3<br>(1.92, 2.83)          | 25.1<br>(20.30, 31.01)       | 21.8<br>(18.28, 25.92)       | <0.0001                      |
| GMR (95% CI) between 2 weeks after boosting and 2 weeks after primary series of ChAdOx1*   | 0.46<br>(0.28, 0.65)         | 0.88<br>(0.58, 1.13)         | 8.49<br>(5.71, 10.44)        | 7.04<br>(4.69, 8.84)         | <0.0001                      |
| GMC (95%CI) at 16-20 weeks after boosting                                                  | NA                           | NA                           | 431.11<br>(367.59, 505.60)   | 314.43<br>(267.01, 370.27)   | 0.0066                       |
| Baseline SARS-CoV-2 IGRA positive, n (%)                                                   | 13 (56.5)                    | 26 (52.0)                    | 9 (18.0)                     | 14 (28.0)                    | <0.0001                      |
| Post-boosting IGRA positive among baseline negative participants, n (%)                    | 0/10<br>(0)                  | 0/24<br>(0)                  | 31/41<br>(75.6)              | 24/26<br>(66.7)              | <0.0001                      |

\*The post primary series GMC was derived from the study in the same setting as the current study [7]. The post primary series GMC (95% CI) at 2 weeks after the second dose of the 2-dose homologous CoronaVac, 4 weeks apart, was 164.4 (133.55, 202.43); and after 2-dose homologous ChAdOx1, 10 weeks apart, was 278.5 (195.66, 396.33).

CI: confidence interval; IQR: interquartile range

Figure 1.

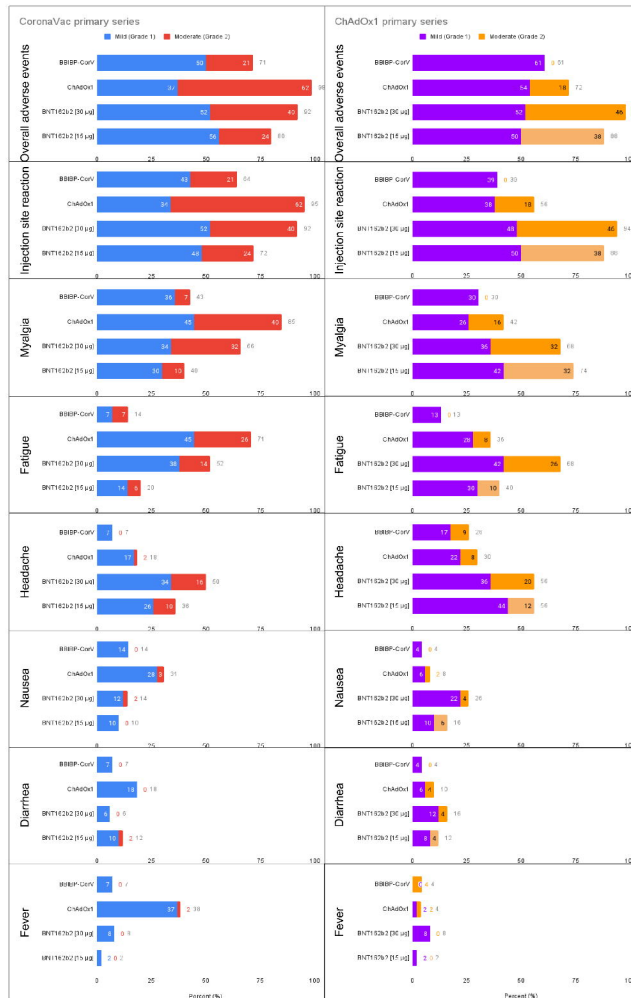



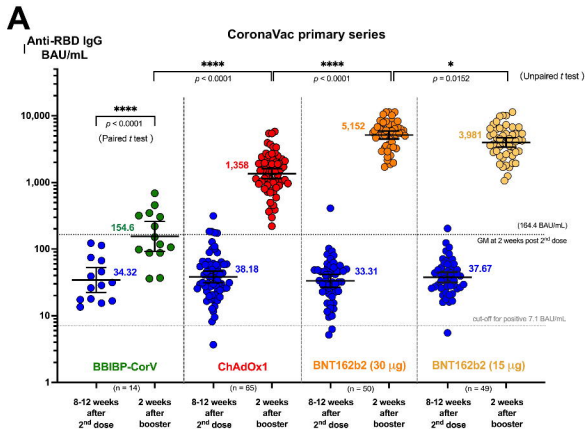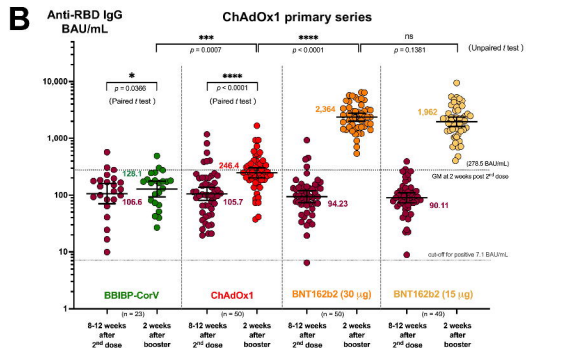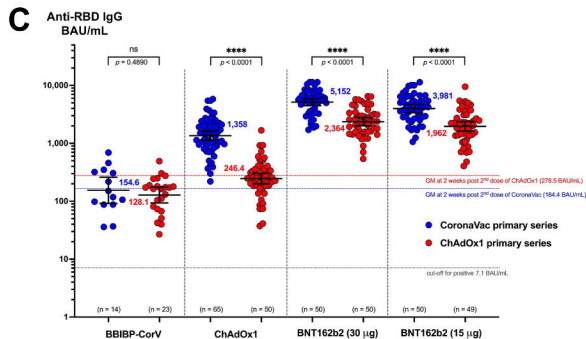

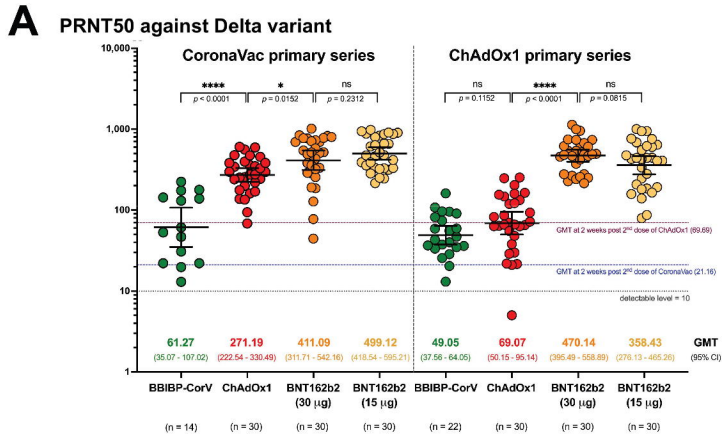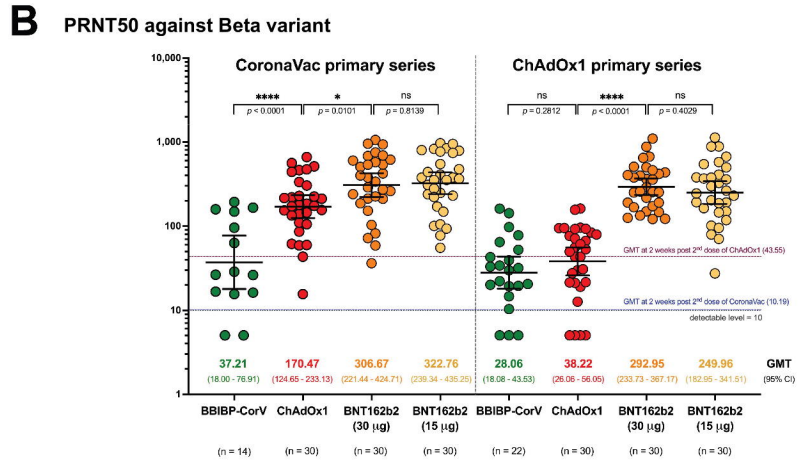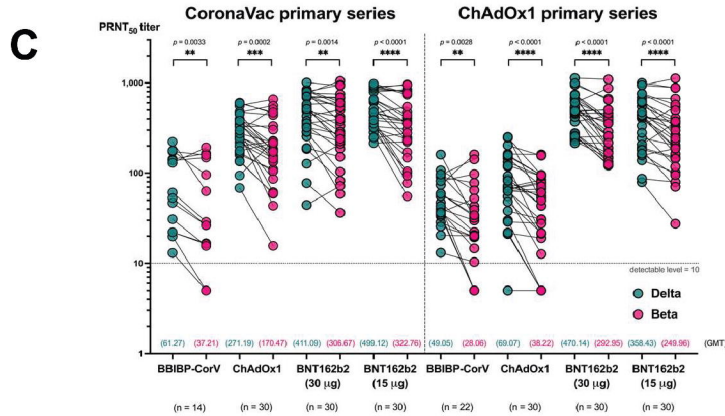

Figure 3.

**A**

PVNT50 against Delta variant

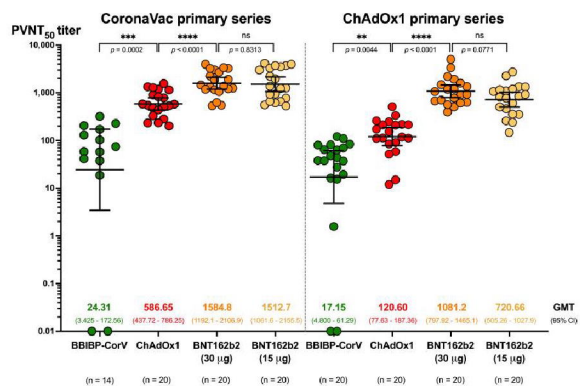**B**

PVNT50 against Omicron variant

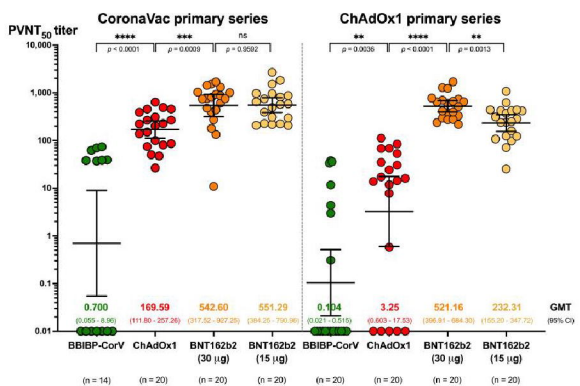**C**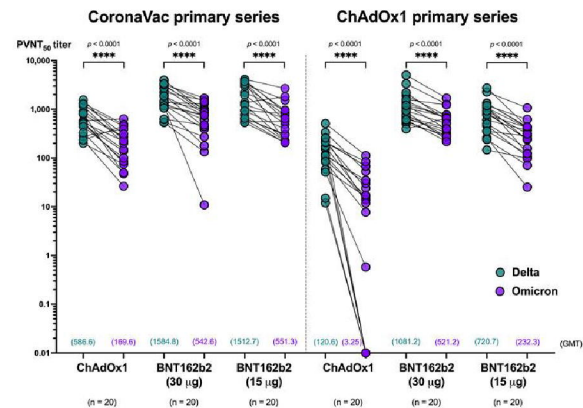**D**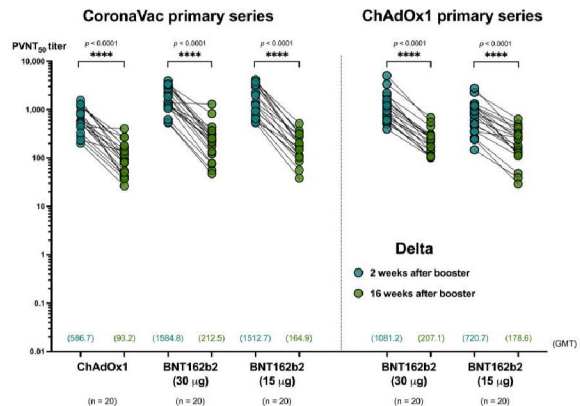**E**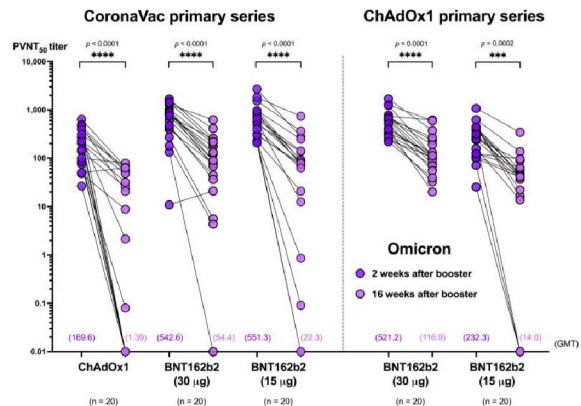

Figure 4.

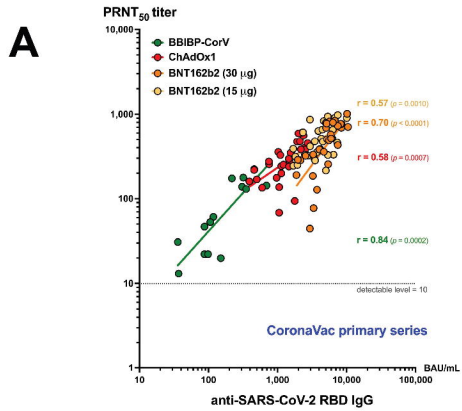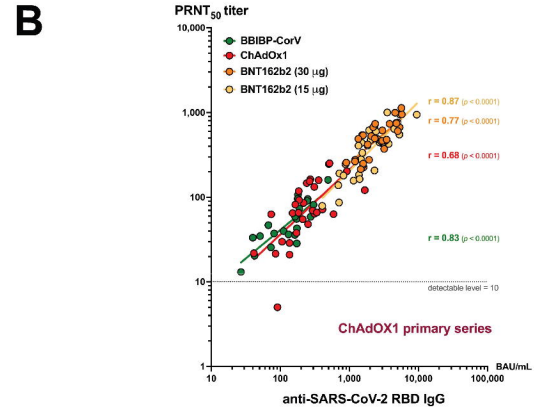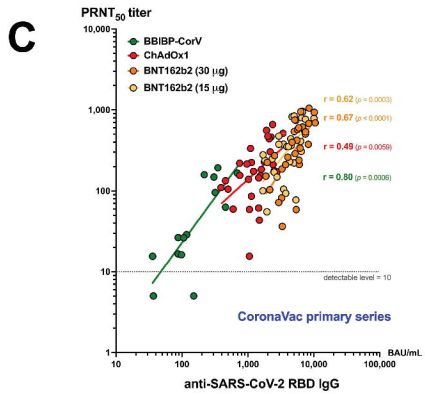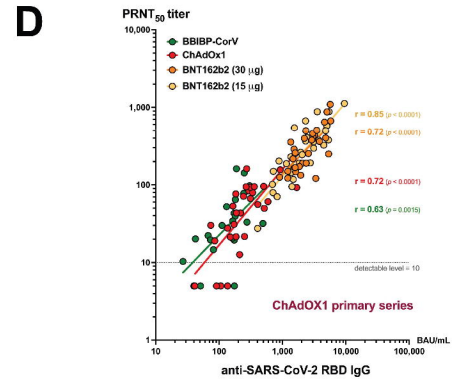

Figure S1.

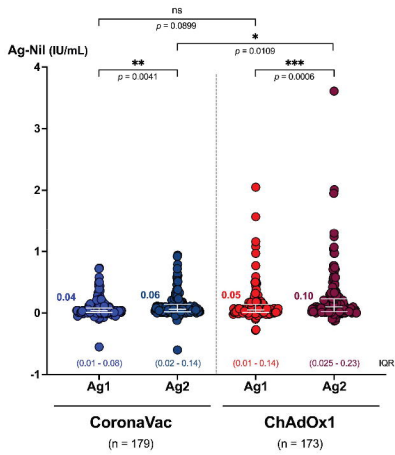

**A**

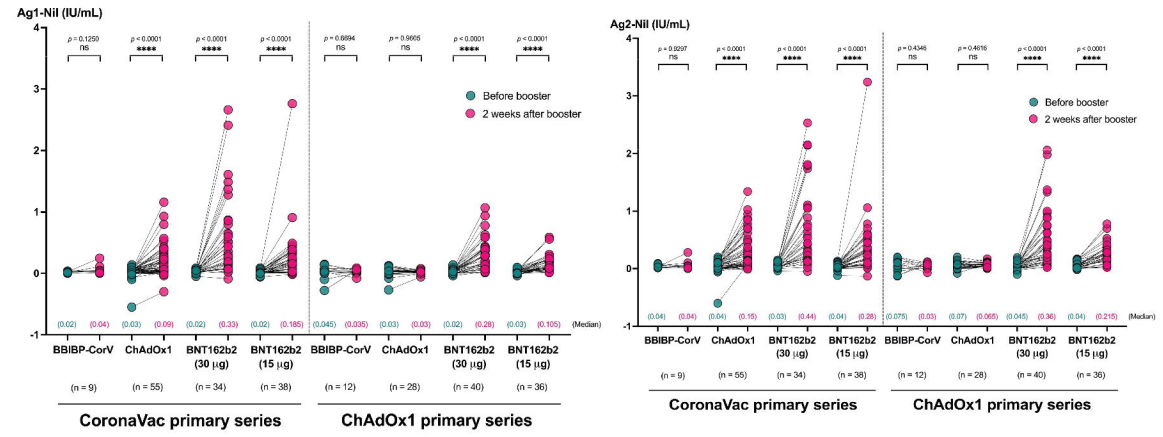

**B**

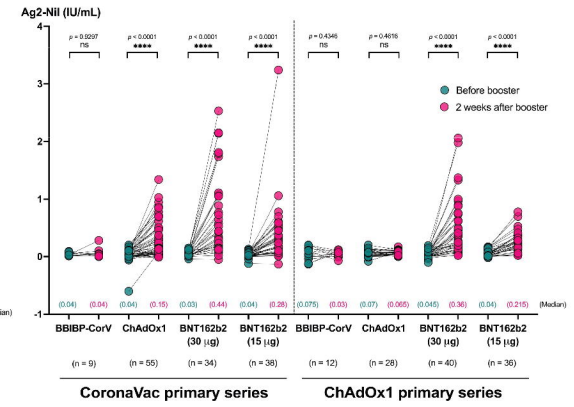

**C**

Figure S2
